# Supplementary material for: Promising two-photon probes for in vivo detection of β amyloid deposits
Source: Royal Society of Chemistry journal article supplement (doi:10.1039/c4cc03897e), 2014-01-01
Supplement: c4cc03897e1.pdf [file c4cc03897e1.pdf]

## ELECTRONIC SUPPLEMENTARY INFORMATION

### Promising two-photon probes for in-vivo detection of $\beta$ amyloid deposits

N. Arul Murugan,<sup>†</sup> Robert Zalesny,<sup>†,||</sup> Jacob Kongsted<sup>‡</sup>, Agneta Nordberg<sup>†</sup> and Hans Ågren<sup>†</sup>

<sup>†</sup>*Division of Theoretical Chemistry and Biology  
School of Biotechnology  
Royal Institute of Technology  
SE-10691 Stockholm, Sweden*

<sup>||</sup>*Theoretical Chemistry Group  
Institute of Physical and Theoretical Chemistry  
Wrocław University of Technology  
Wyb. Wyspiańskiego 27, PL-50370, Wrocław, Poland*

<sup>‡</sup>*Department of Physics, Chemistry and Pharmacy  
University of Southern Denmark  
Campusvej 55, DK-5230 Odense M, Denmark*

<sup>†</sup>*Karolinska Institute  
Department of Clinical Neuroscience  
Division of Molecular Neuropharmacology  
Huddinge University Hospital, B 84  
S-141 86 Stockholm, Sweden*

## A. Computational details

The molecular structures of the three donor/acceptor group substituted phenyl polymethines are referred to as NIRF-0, NIRF-1 and NIRF-2 and were optimized using density functional theory with the B3LYP exchange-correlation functional together with the 6-311+g(d,p) basis set using the Gaussian09 package.<sup>1</sup> The geometry optimization was performed for the molecules in vacuo as well as in solution (dichloromethane). In the latter case, the PCM method was used. The one- and two-photon absorption spectra calculations in both vacuo and solution (on the respective geometries in vacuo and solution) were carried out using the CAM-B3LYP<sup>2</sup> functional and the TZVP<sup>3</sup> basis set employed for all atoms. For the calculations in solution the Polarizable Continuum Model<sup>4</sup> was used and the solute cavity was based on the UAHF model<sup>5</sup> The one- and two photon absorption properties were computed using linear and quadratic response theory within time-dependent density functional, respectively. All property calculations were performed using a locally modified version of the DALTON program<sup>6</sup>.

The two-photon absorption cross section,  $\sigma^{2PA}(\omega)$  in Göppert-Mayer units was computed using the following expression:

$$\sigma^{2PA}(2\omega) = \frac{4\pi^3 \alpha a_0^5 \omega^2}{c} g(2\omega) \delta^{2PA} \quad (1)$$

where  $\alpha$  is the fine structure constant,  $a_0$  is the Bohr radius,  $c$  is the speed of light,  $\omega$  is the energy of the photon,  $g(2\omega)$  is the line shape function and  $\delta^{2PA}$  is the two-photon transition rate in atomic units. For the line shape function corresponding to a transition to a final state  $f$ , we assume a Lorentzian function:

$$g(2\omega) = \frac{1}{\pi} \frac{\frac{1}{2}\Gamma_f}{(\omega_f - 2\omega)^2 + (\frac{1}{2}\Gamma_f)^2} \quad (2)$$

In all calculations we used  $\Gamma_f=0.1$  eV.<sup>7</sup>

## B. Three-state model

A three-state model (TSM), which is a special case of a generalized few-state model suggested by Alam et al.<sup>8,9</sup>, considers three electronic states: the ground ( $|0\rangle$ ), intermediate ( $|i\rangle$ ) and final ( $|f\rangle$ ) states. The excited state  $|f\rangle$  is also included as an intermediate in this model. The two-photon absorption probability corresponding to excitation from the ground to the final excited state is given by:

$$\delta_{3SM}^{f \leftarrow 0} = \delta^{ii} + \delta^{ff} + 2\delta^{if} \quad (3)$$

where

$$\delta^{ii} = \frac{4}{15} \left( \frac{|\mu^{0i}| |\mu^{if}|}{\omega_i - \frac{1}{2}\omega_f} \right)^2 (2\cos^2(\theta_{if}^{0i}) + 1) \quad (4)$$

$$\delta^{ff} = \frac{16}{15} \left( \frac{|\mu^{0f}| |\mu^{ff}|}{\omega_f} \right)^2 (2\cos^2(\theta_{ff}^{0f}) + 1) \quad (5)$$

$$\delta^{if} = \frac{8}{15} \left( \frac{|\mu^{0i}| |\mu^{0f}| |\mu^{if}| |\mu^{ff}|}{\omega_f(\omega_i - \frac{1}{2}\omega_f)} \right) (\cos\theta_{0f}^{ff} \cos\theta_{0i}^{if} + \cos\theta_{0f}^{0i} \cos\theta_{ff}^{if} + \cos\theta_{0f}^{if} \cos\theta_{0i}^{ff}). \quad (6)$$

Here  $\hbar\omega_i$  stands for the excitation energy from the ground state to the excited state  $|i\rangle$ ,  $\mu^{ij} = \langle i|\vec{\mu}|j\rangle$  and  $\theta_{ij}^{kl}$  is the angle between (transition) dipole moments  $\mu^{ij}$  and  $\mu^{kl}$ .

### C. Additional data

Table 1: Bond lengths (in Å) and BLA for NIRF-0, NIRF-1 and NIRF-2 in dichloromethane solvent. C1 refers to the polymethine carbon connected to the phenyl group while C7 refers to the carbon atom connected to the cyano groups and the intermediate carbons are labeled accordingly.

| Probe $\Rightarrow$     | NIRF-0   | NIRF-1   | NIRF-2   |
|-------------------------|----------|----------|----------|
| Atom pairs $\Downarrow$ |          |          |          |
| C1-C2                   | 1.4224   | 1.4279   | 1.4322   |
| C2-C3                   | 1.3836   | 1.3768   | 1.3737   |
| C3-C4                   |          | 1.4066   | 1.4122   |
| C4-C5                   |          | 1.3875   | 1.3807   |
| C5-C6                   |          |          | 1.4040   |
| C6-C7                   |          |          | 1.3894   |
| N-C                     | 1.3544   | 1.3577   | 1.3603   |
| C-CCN                   | 1.4202   | 1.4200   | 1.4195   |
|                         | (1.4235) | (1.4190) | (1.4183) |
| BLA                     | 0.04     | 0.07     | 0.10     |

Table 2: Ground and excited-state dipole moments (in Debyes) for NIRF-0 as obtained from CAM-B3LYP and RI-CC2 levels of theory using the TZVPP basis set. The calculations were carried out at the optimized gas phase geometry (B3LYP/6-311+G(d,p) level of theory). RI-CC2 calculations were performed using the TURBOMOLE 6.4 program.<sup>10</sup>

| State | CAM-B3LYP | RI-CC2 |
|-------|-----------|--------|
| 0     | 11.16     | 10.82  |
| 1     | 15.16     | 17.83  |
| 2     | 12.09     | 11.41  |
| 3     | 16.36     | 17.07  |

## References

- [1] M. J. Frisch, G. W. Trucks, H. B. Schlegel, G. E. Scuseria, M. A. Robb, J. R. Cheeseman, G. Scalmani, V. Barone, B. Mennucci, G. A. Petersson, H. Nakatsuji, M. Caricato, X. Li, H. P. Hratchian, A. F. Izmaylov, J. Bloino, G. Zheng, J. L. Sonnenberg, M. Hada, M. Ehara, K. Toyota, R. Fukuda, J. Hasegawa, M. Ishida, T. Nakajima, Y. Honda, O. Kitao, H. Nakai, T. Vreven, J. A. Montgomery, Jr., J. E. Peralta, F. Ogliaro, M. Bearpark, J. J. Heyd, E. Brothers, K. N. Kudin, V. N. Staroverov, R. Kobayashi, J. Normand, K. Raghavachari, A. Rendell, J. C. Burant, S. S. Iyengar, J. Tomasi, M. Cossi, N. Rega, J. M. Millam, M. Klene, J. E. Knox, J. B. Cross, V. Bakken, C. Adamo, J. Jaramillo, R. Gomperts, R. E. Stratmann, O. Yazyev, A. J. Austin, R. Cammi, C. Pomelli, J. W. Ochterski, R. L. Martin, K. Morokuma, V. G. Zakrzewski, G. A. Voth, P. Salvador, J. J. Dannenberg, S. Dapprich, A. D. Daniels, O. Farkas, J. B. Foresman, J. V. Ortiz, J. Cioslowski, and D. J. Fox, *Gaussian 09, Revision A.02*, Gaussian, Inc., Wallingford, CT, 2009.
- [2] T. Yanai, D. P. Tew and N. C. Handy, *Chem. Phys. Lett.*, 2004, **393**, 51–57.
- [3] A. Schafer, C. Huber and R. Ahlrichs, *J. Chem. Phys.*, 1994, **100**, 5829–5835.
- [4] J. Tomasi, B. Mennucci and E. Cancès, *J. Mol. Struct. (Theochem)*, 1999, **464**, 211–226.
- [5] V. Barone, M. Cossi and J. Tomasi, *J. Chem. Phys.*, 1997, **107**, 3210–3221.
- [6] K. Aidas, C. Angeli, K. L. Bak, V. Bakken, R. Bast, L. Boman, O. Christiansen, R. Cimiraglia, S. Coriani, P. Dahle, E. K. Dalskov, U. Ekström, T. Enevoldsen, J. J. Eriksen, P. Etenhuber, B. Fernández, L. Ferrighi, H. Fliegl, L. Frediani, K. Hald, A. Halkier, C. Hättig, H. Heiberg, T. Helgaker, A. C. Hennum, H. Hettema, E. Hjertenæs, S. Høst, I.-M. Høyvik, M. F. Iozzi, B. Jansík, H. J. A. Jensen, D. Jonsson, P. Jørgensen, J. Kauczor, S. Kirpekar, T. Kjærgaard, W. Klopper, S. Knecht, R. Kobayashi, H. Koch, J. Kongsted, A. Krapp, K. Kristensen, A. Ligabue, O. B. Lutnæs, J. I. Melo, K. V. Mikkelsen, R. H. Myhre, C. Neiss, C. B. Nielsen, P. Norman, J. Olsen, J. M. H. Olsen, A. Osted, M. J. Packer, F. Pawłowski, T. B. Pedersen, P. F. Provasi, S. Reine, Z. Rinkevicius, T. A. Ruden, K. Ruud, V. V. Rybkin, P. Saek, C. C. M. Samson, A. S. de Merás, T. Saue, S. P. A. Sauer, B. Schimmelpfennig, K. Sneskov, A. H. Steindal, K. O. Sylvester-Hvid, P. R. Taylor, A. M. Teale, E. I. Tellgren, D. P. Tew, A. J. Thorvaldsen, L. Thøgersen, O. Vahtras, M. A. Watson, D. J. D. Wilson, M. Ziolkowski and H. Ågren, *Wiley Interdisciplinary Reviews: Computational Molecular Science*, 2014, 00–00.
- [7] M. Albota, D. Beljonne, J.-L. Brédas, J. E. Ehrlich, J.-Y. Fu, A. A. Heikal, S. E. Hess, T. Kogej, M. D. Levin, S. R. Marder, D. McCord-Maughon, J. W. Perry, H. Röckel, M. Rumi, G. Subramaniam, W. W. Webb, X.-L. Wu and C. Xu, *Science*, 1998, **281**, 1653–1656.
- [8] M. M. Alam, M. Chattopadhyaya and S. Chakrabarti, *J. Phys. Chem. A*, 2012, **116**, 8067–8073.
- [9] M. M. Alam, M. Chattopadhyaya and S. Chakrabarti, *Phys. Chem. Chem. Phys.*, 2012, **14**, 1156–1165.
- [10] *TURBOMOLE V6.4 2012, a development of University of Karlsruhe and Forschungszentrum Karlsruhe GmbH, 1989-2007, TURBOMOLE GmbH, since 2007; available from*  
<http://www.turbomole.com>.
